# Supplementary material for: Cochaperone Mzb1 is a key effector of Blimp1 in plasma cell differentiation and β1-integrin function
Source: PubMed Central journal article supplement — Proc Natl Acad Sci U S A. 2018 Sep 26;115(41):E9630–9. doi: 10.1073/pnas.1809739115 (PMC6187189; doi:10.1073/pnas.1809739115), 2018-09-26
Supplement: pnas.1809739115.sapp.pdf [file pnas.1809739115.sapp.pdf]

## Supplementary Information for

### **Cochaperone Mzb1 is a key effector of Blimp1 in plasma cell differentiation and $\beta$ 1 integrin function**

Virginia Andreani, Senthilkumar Ramamoorthy, Abhinav Pandey, Ekaterina Lupar, Stephen L. Nutt, Tim Lämmermann and Rudolf Grosschedl

Corresponding author: Rudolf Grosschedl  
[grosschedl@ie-freiburg.mpg.de](mailto:grosschedl@ie-freiburg.mpg.de)

#### **This PDF file includes:**

Figs. S1 to S3

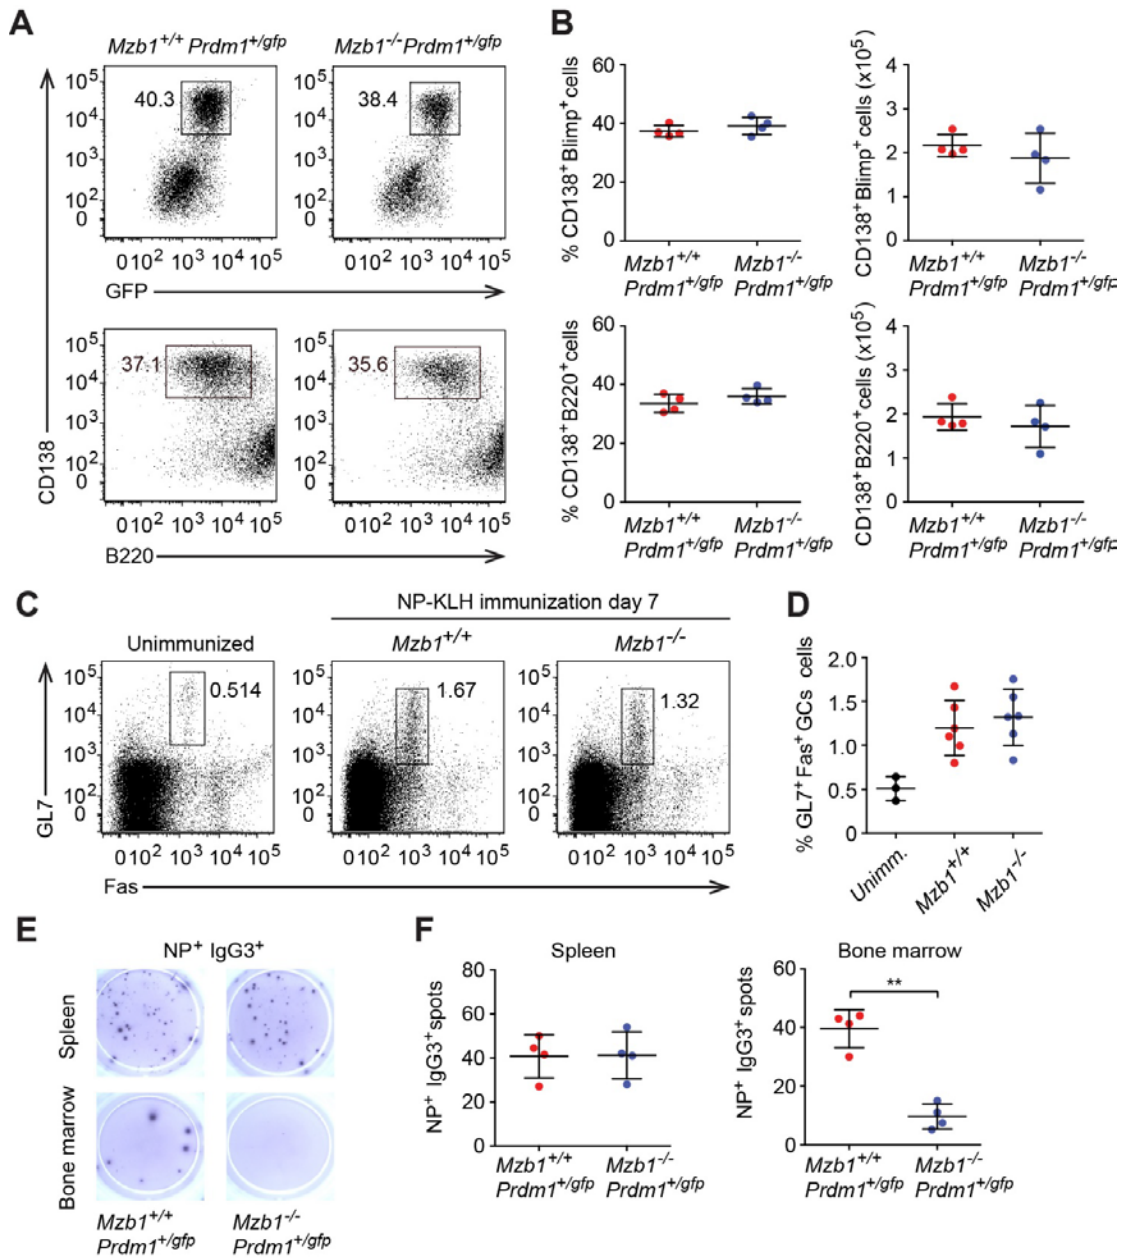

**Figure S1** (related to Figure 1 and Figure 2)

(A) Flow cytometry to identify CD138<sup>+</sup>Blimp-GFP<sup>+</sup> cells (top) and CD138<sup>+</sup>B220<sup>+</sup> cells (bottom) among B220<sup>+</sup> *Mzb1<sup>+/+</sup>Prdm1<sup>+gfp</sup>* and *Mzb1<sup>-/-</sup>Prdm1<sup>+gfp</sup>* splenocytes that were stimulated with CD40L, IL4 and IL5 in vitro for 5 d. Numbers represent cell frequencies.

(B) Mean ( $\pm$ SD) frequencies and numbers of CD138<sup>+</sup>Blimp-GFP<sup>+</sup> cells (top) and CD138<sup>+</sup>B220<sup>+</sup> cells (bottom), as gated in A. Data represent three independent experiments.

(C-D) Flow cytometry to determine the frequencies of GL7<sup>+</sup>Fas<sup>+</sup> germinal center (GC) B cells in *Mzb1<sup>+/+</sup>* and *Mzb1<sup>-/-</sup>* mice 7 d after immunization with NP-KLH. Representative dot plots (C) and mean ( $\pm$ SD) frequencies (D) of GL7<sup>+</sup>Fas<sup>+</sup> GC B cells in unimmunized and NP-KLH-immunized mice. Data are representative of three different experiments with 3-5 mice per group.

Representative ELISpot (E) and mean ( $\pm$ S.D.) numbers (F) of NP<sup>+</sup>IgG3<sup>+</sup> CD138<sup>+</sup>Blimp-GFP<sup>+</sup> cells in spleen (top) and BM (bottom) 3 d p.i. with NP-Ficoll. n = 4.

\*\*p<0.01.

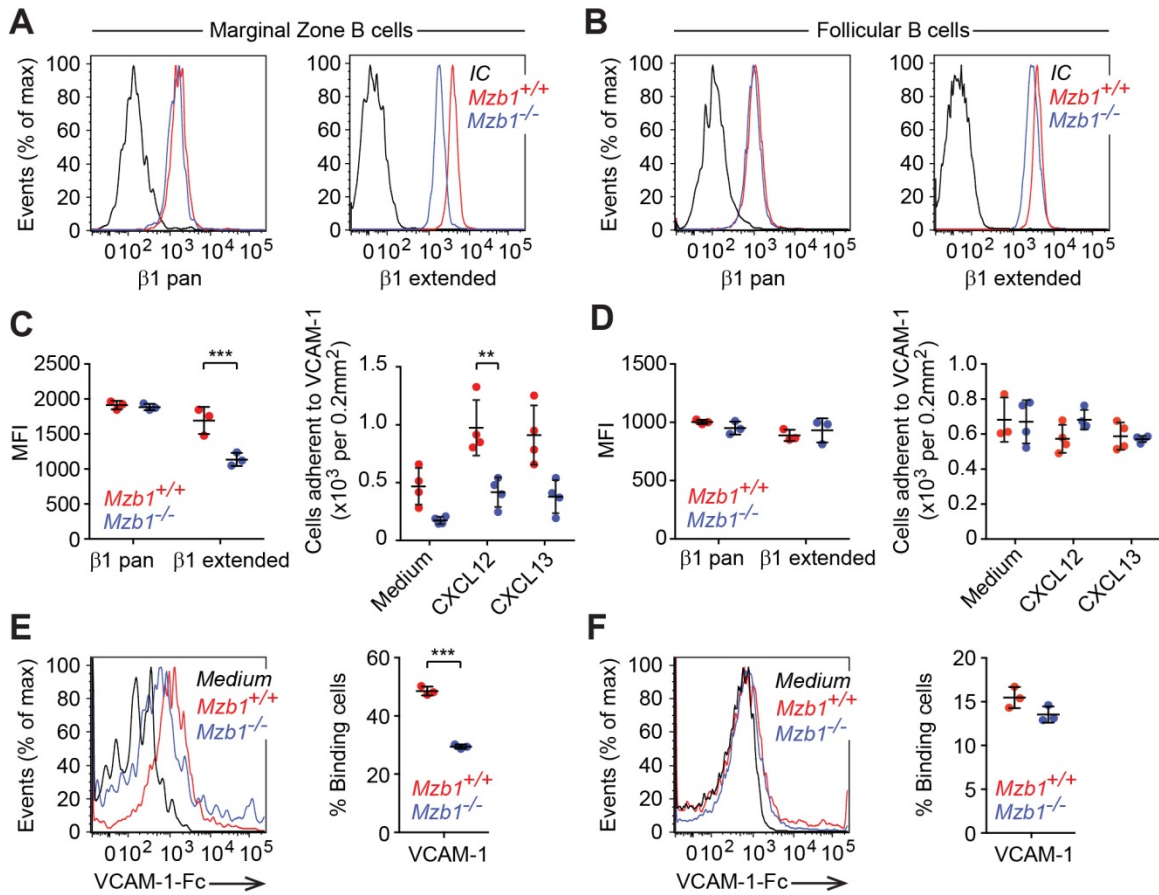

**Figure S2** (related to Figure 4)

Representative histograms of total  $\beta 1$  ( $\beta 1$  pan) and extended  $\beta 1$  integrin in  $Mzb1^{+/+}$  and  $Mzb1^{-/-}$  marginal zone (MZ) B cells (A) and Follicular (Fo) B cells (B). IC: Isotype Control. (C) Quantification of the data shown in A by determining the mean fluorescence intensities (MFI)  $\pm$  S.D. (left) and analysis of adhesion of  $Mzb1^{+/+}$  and  $Mzb1^{-/-}$  MZ B cells to slides coated with VCAM-1 after stimulation with CXCL12 and CXCL13 (right). (D) Quantification of the data shown in B (left) and adhesion of  $Mzb1^{+/+}$  and  $Mzb1^{-/-}$  Fo B cells to slides coated with VCAM-1 after stimulation with CXCL12 and CXCL13 (right). Representative histograms showing the ability of  $Mzb1^{+/+}$  and  $Mzb1^{-/-}$  MZ B cells (E) and Fo B cells (F) to bind soluble VCAM-1 (left) and quantification of the frequency of the binding cells (right). Data are representative of three different experiments. \*\* $p < 0.01$ , \*\*\* $p < 0.001$ .

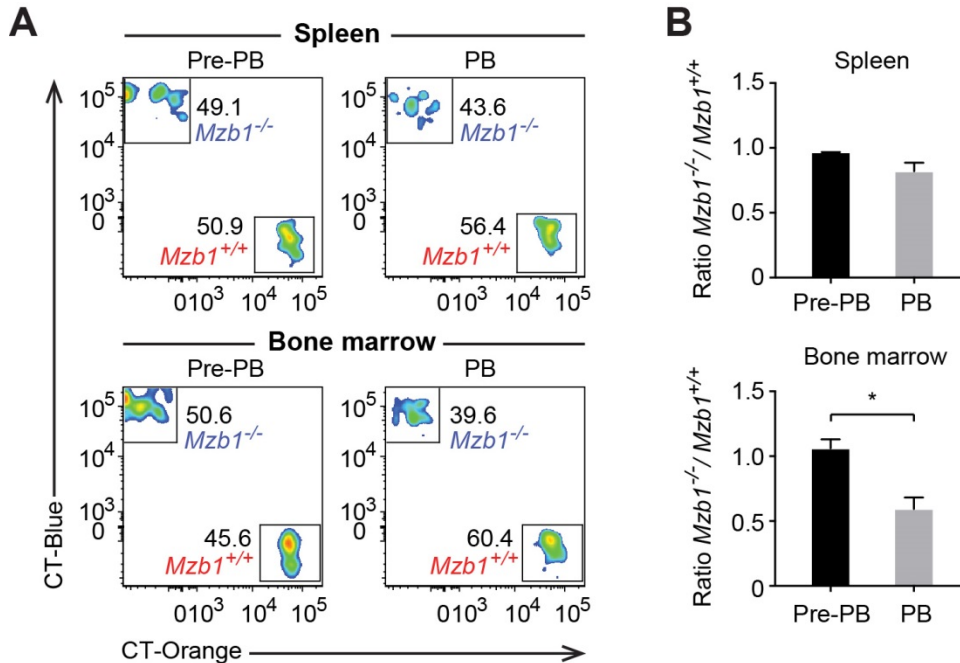

**Figure S3** (related to Figure 6)

(A) Flow cytometry to assess trafficking of *in vitro* generated Pre-PB and PB after adoptive transfer into recipient mice. CD138<sup>-</sup>Blimp-GFP<sup>+</sup> Pre-PB and CD138<sup>+</sup>Blimp-GFP<sup>+</sup> PB were generated by LPS stimulation of B220<sup>+</sup> splenic cells from *Mzb1*<sup>+/+</sup>*Prdm1*<sup>+/gfp</sup> and *Mzb1*<sup>-/-</sup>*Prdm1*<sup>+/gfp</sup> mice. After FACS sorting, cells were fluorescently labeled with cell tracker (CT) orange (*Mzb1*<sup>+/+</sup>) and CT blue (*Mzb1*<sup>-/-</sup>) and adoptively transferred in wild type recipients. The appearance of *Mzb1*<sup>+/+</sup> and *Mzb1*<sup>-/-</sup> cells in spleen (top) and BM (bottom) of the recipient mice was analyzed. The numbers in each contour plot represent cell frequencies. (B) Ratios ( $\pm$ S.D) between *Mzb1*<sup>-/-</sup> and *Mzb1*<sup>+/+</sup> Pre-PB and PB that migrated to the spleen (top) and BM (bottom). Data represent 2 independent experiments. n=3. \*p<0.05, \*\*p<0.01.
